# Supplementary material for: Optimization of extracellular vesicle isolation and their separation from lipoproteins by size exclusion chromatography
Source: PubMed Central journal article supplement — J Extracell Biol. 2023 Jul 8;2(7):e100. doi: 10.1002/jex2.100 (PMC11080862; doi:10.1002/jex2.100), 2023-07-08
Supplement: JEX2-2-e100-s001.pdf [file JEX2-2-e100-s001.pdf]

## Supplementary Figures

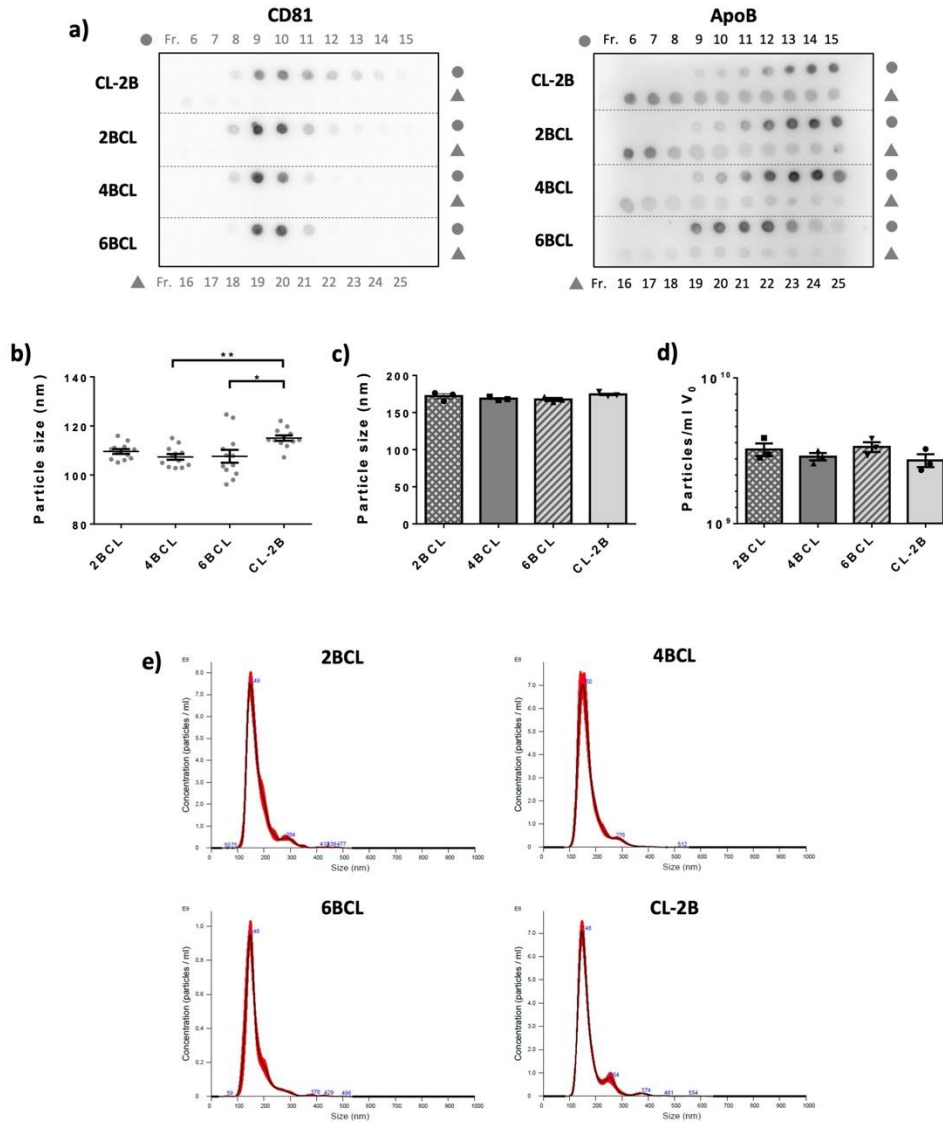

**Figure S1. Characterization of EV-enriched fractions obtained by SEC with standard agarose resins. a)** Representative dot blots from the analyses of EVs (CD81) and LPP (ApoB) markers in SEC fractions. **b)** Mean particle size of EVs, as derived from TEM images using TEM Exosome Analyzer. The mean  $\pm$  SEM from the analyses of 12 images from 2 independent experiments are shown. Significant differences in the One-way Anova statistical test are indicated with \* ( $P \leq 0.05$ ) or \*\* ( $P \leq 0.01$ ). **c)** Mean particle size of particles analyzed by NTA. The mean  $\pm$  SEM from 3 independent experiments is shown. **d)** Concentration of particles in EV-enriched fraction pools analyzed by NTA, represented as particles per ml of initial volume of conditioned media ( $V_0$ ). The mean  $\pm$  SEM of 3 independent experiments is shown. **e)** Size profile of particles in pools of EV-enriched fractions analyzed by NTA.

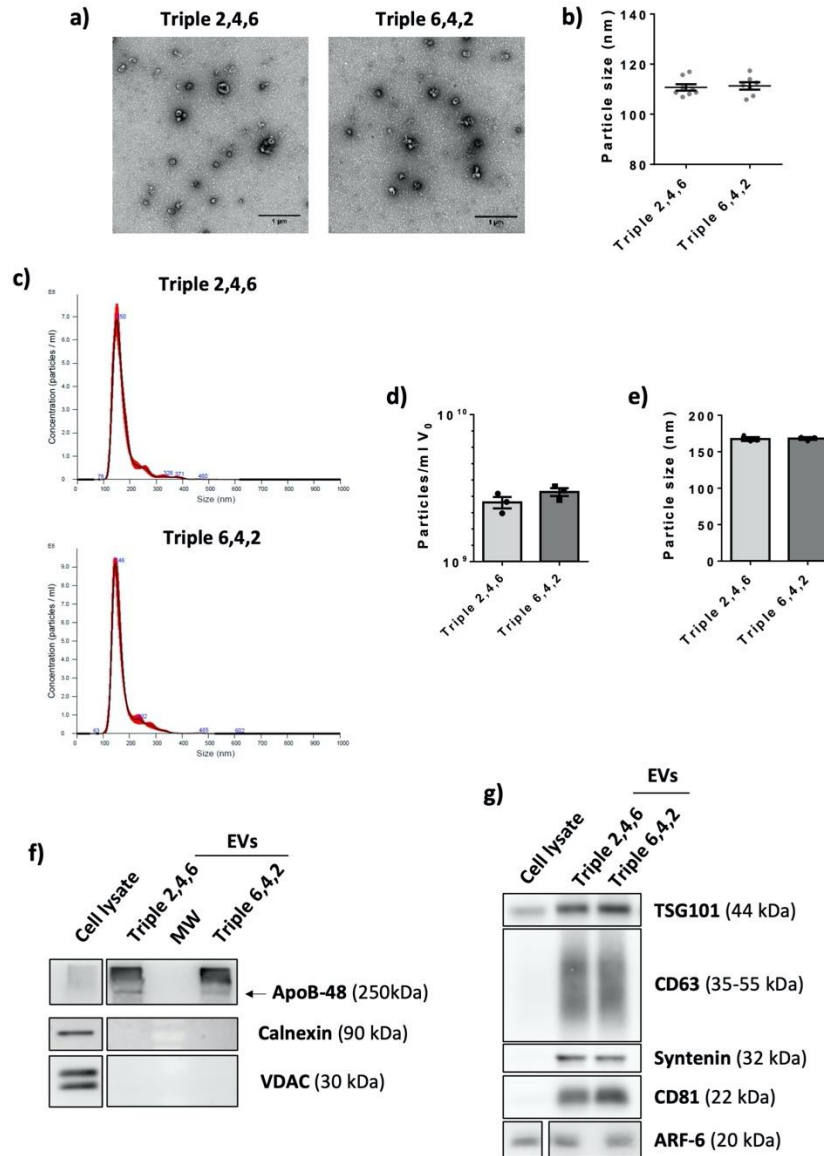

**Figure S2. Characterization of EV-enriched fractions obtained by SEC with columns that combined agarose resins of different percentages.** **a)** Representative TEM images of negatively stained samples from the EV-enriched fraction pools isolated with the different columns. Bars=1 $\mu$ m. **b)** Mean EV diameter of EVs derived from TEM Exosome Analyser on TEM images. 8 images from 2 independent experiments were analyzed and the data was shown as means  $\pm$  SEM. **c)** Size profile, **d)** concentration (represented as particles per ml of initial volume of conditioned media ( $V_0$ )) and **e)** mean particle size of particles in EV-enriched fraction pools analyzed by NTA. Means  $\pm$  SEM of 3 independent experiments are shown. **f)** Western blot analyses of non-EV markers (ApoB, Calnexin or VDAC) or **g)** EV markers (TSG101, CD63, Syntenin-1, CD81 and ARF6) in pools of EV-enriched fractions. Protein content was measured by BCA and a total of 10 $\mu$ g was loaded in each lane. The same amount of total cell lysate was included.

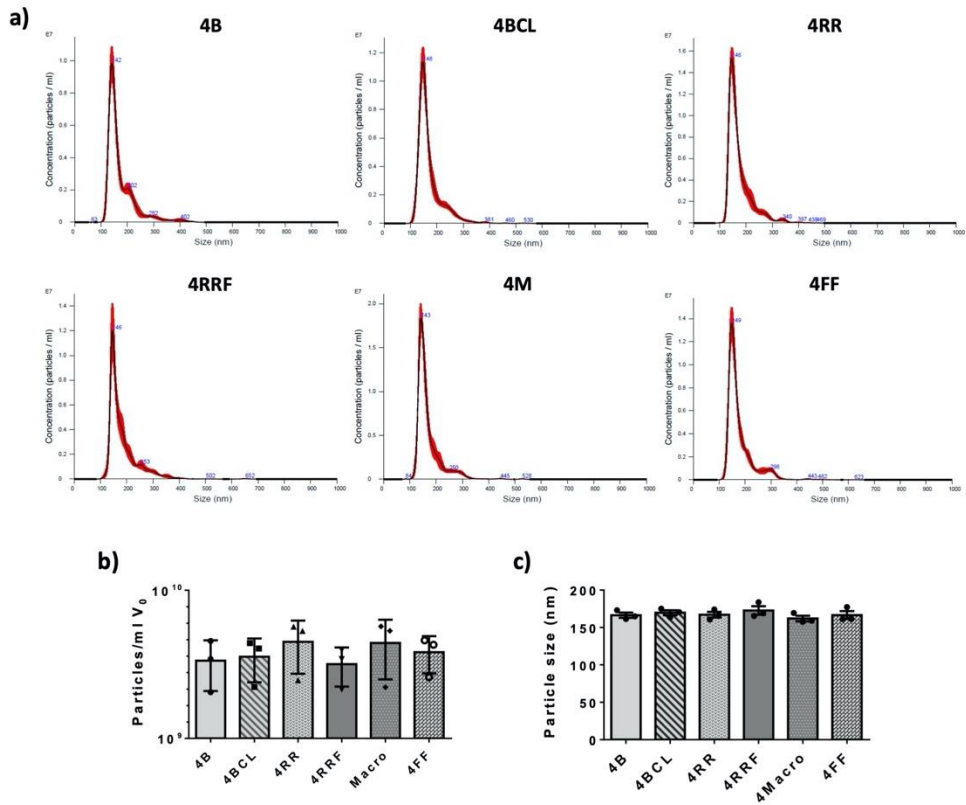

**Figure S3. NTA characterization of EV-enriched fractions obtained by SEC with 4% agarose resins of different crosslinking or bead size. a) Size profile, b) Concentration (represented as particles per ml of initial volume of conditioned media ( $V_0$ )) and c) Mean particle size of particles in EV-enriched fraction pools analyzed by NTA. Means  $\pm$  SEM from 3 independent experiments are shown.**

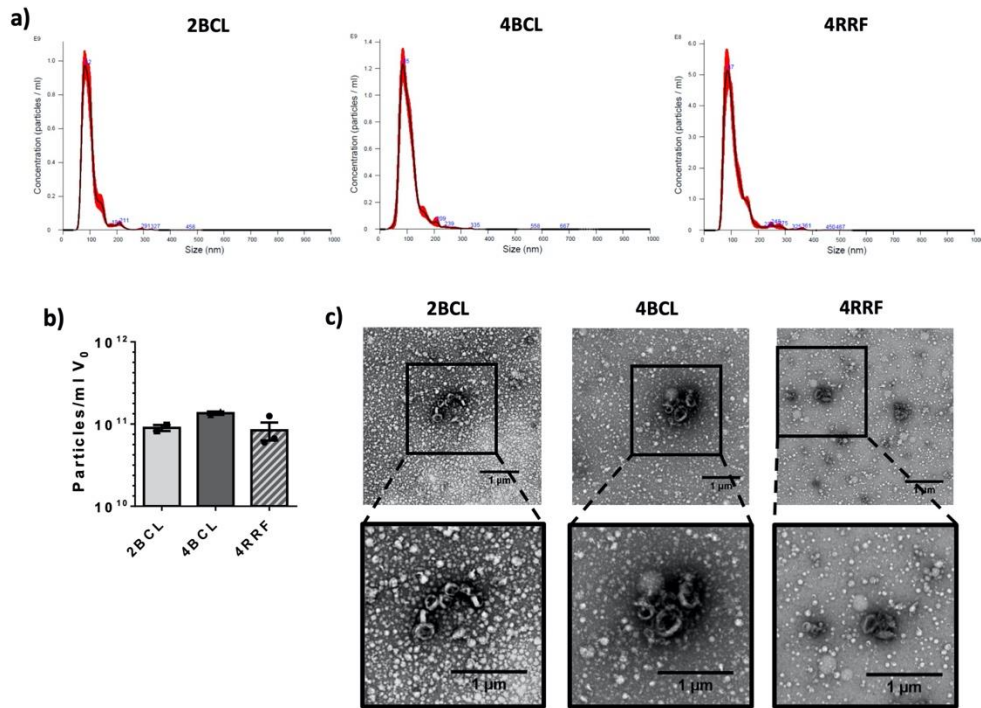

**Figure S4. NTA and TEM characterization of EV-enriched fractions obtained by SEC of plasma samples. a)** Size profile and **b)** Concentration of particles in EV-enriched fractions pools analyzed by NTA, represented as particles per ml of initial volume of plasma ( $V_0$ ). Means  $\pm$  SEM from 3 independent experiments are shown. **c)** Representative TEM images of negatively stained samples from EV-enriched fractions isolated with the different resins. Bars=1  $\mu$ m.
